# Supplementary material for: Growth Inhibition of Phaeocystis Globosa Induced by Luteolin-7-O-glucuronide from Seagrass Enhalus acoroides
Source: MDPI journal article supplement (doi:10.3390/ijerph16142615), 2019-07-23
Supplement: s1 [file s1]

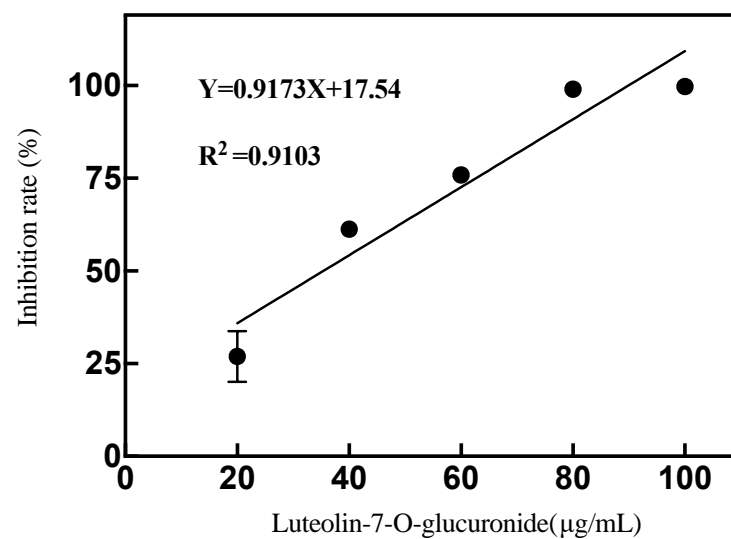

**Figure S1.** Correlation relationships between the contents of luteolin-7-O-glucuronide and the inhibition rate at 96 h.

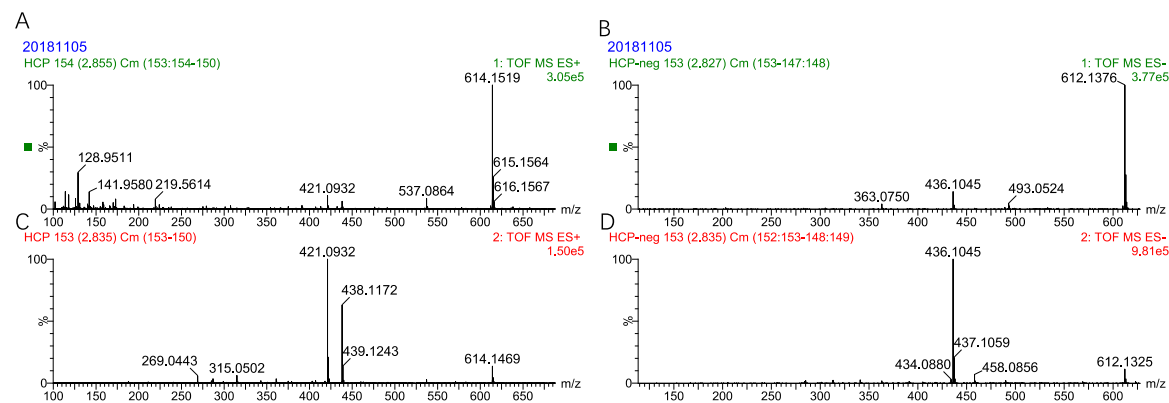

**Figure S2.** Mass spectrogram of polypeptide (unknown) at 2.83 min (**A**) positive ionization mode at low energy channels; (**B**) negative ionization mode at low energy channels; (**C**) positive ionization mode at high energy channels; (**D**) negative ionization mode at high energy channels.

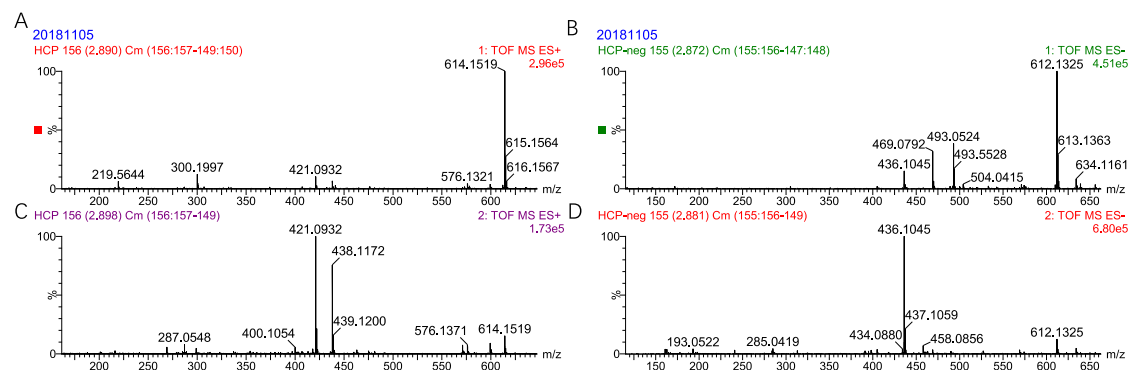

**Figure S3.** Mass spectrogram of polypeptide (unknown) at 2.90 min (**A**) positive ionization mode at low energy channels; (**B**) negative ionization mode at low energy channels; (**C**) positive ionization mode at high energy channels; (**D**) negative ionization mode at high energy channels.

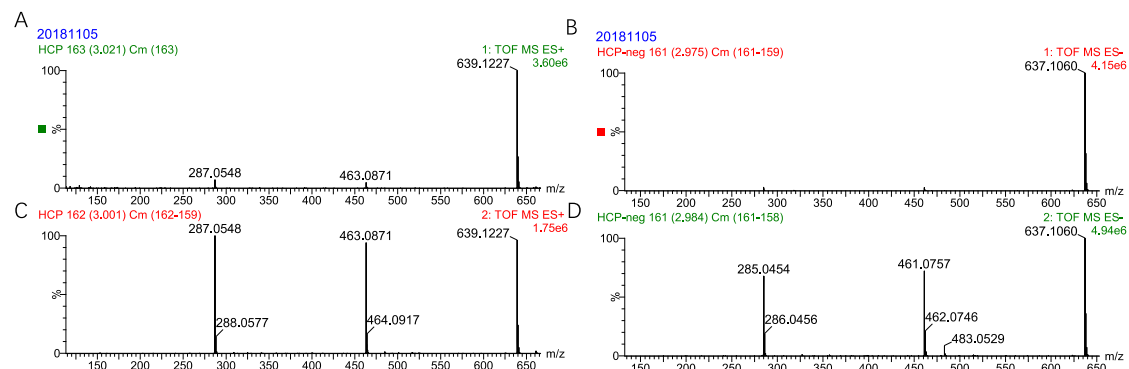

**Figure S4.** Mass spectrogram of luteolin-3',7-O-diglucuronides at 3.00 min (A) positive ionization mode at low energy channels; (B) negative ionization mode at low energy channels; (C) positive ionization mode at high energy channels; (D) negative ionization mode at high energy channels.

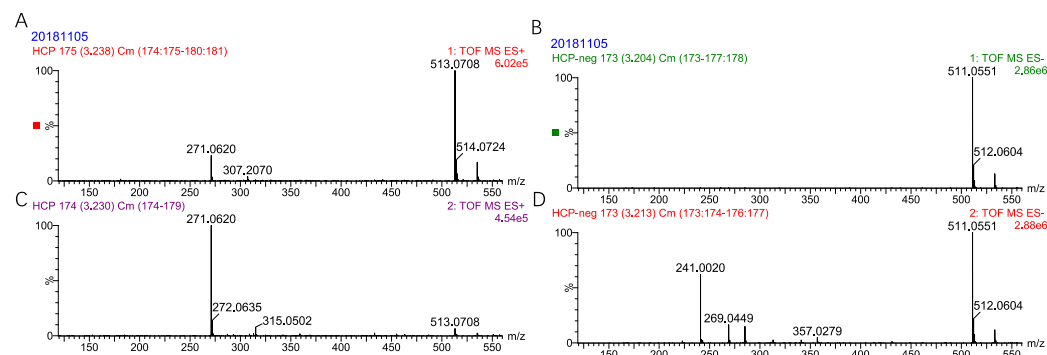

**Figure S5.** Mass spectrogram of diploretrohydroxycarmalol at 3.22 min (A) positive ionization mode at low energy channels; (B) negative ionization mode at low energy channels; (C) positive ionization mode at high energy channels; (D) negative ionization mode at high energy channels.

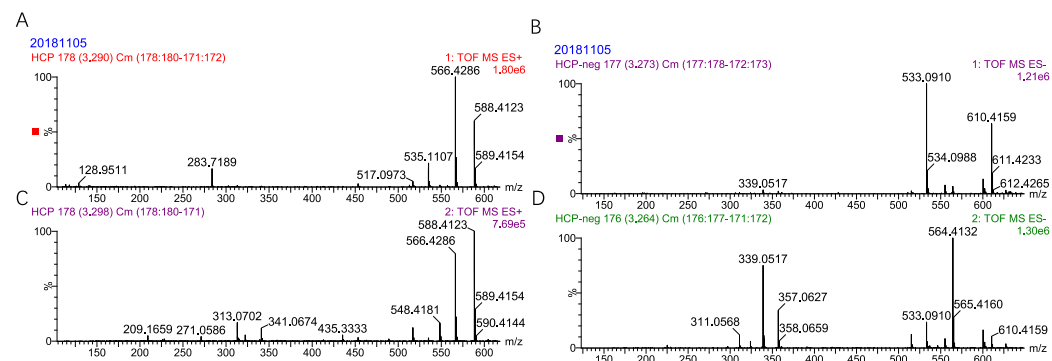

**Figure S6.** Mass spectrogram of cyclo (L-leucyl-L-leucyl-L-leucyl-L-leucyl-L-leucyl) at 3.27 min (A) positive ionization mode at low energy channels; (B) negative ionization mode at low energy channels; (C) positive ionization mode at high energy channels; (D) negative ionization mode at high energy channels.

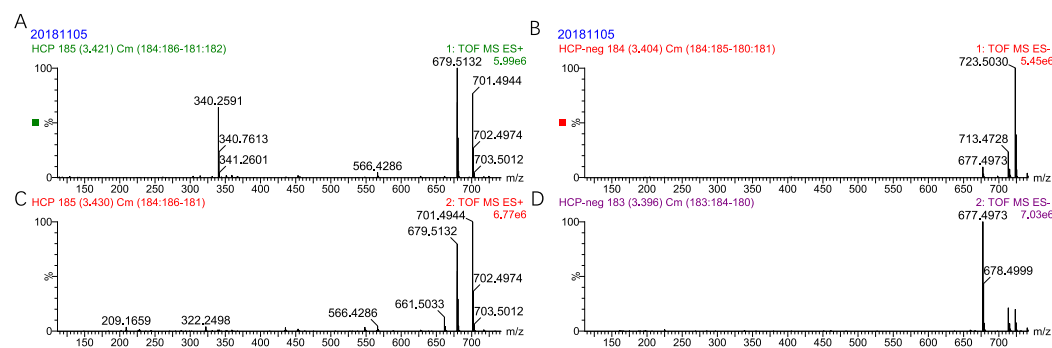

**Figure S7.** Mass spectrogram of cyclo (L-leucyl-L-leucyl-L-leucyl-L-leucyl-L-leucyl) at 3.42 min (A) positive ionization mode at low energy channels; (B) negative ionization mode at low energy channels; (C) positive ionization mode at high energy channels; (D) negative ionization mode at high energy channels.

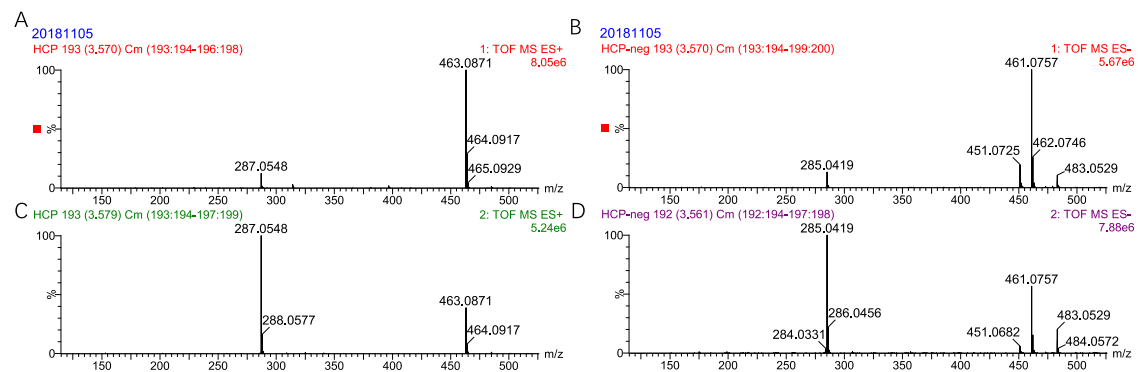

**Figure S8.** Mass spectrogram of luteolin-7-O-glucuronide at 3.55 min (**A**) positive ionization mode at low energy channels; (**B**) negative ionization mode at low energy channels; (**C**) positive ionization mode at high energy channels; (**D**) negative ionization mode at high energy channels.

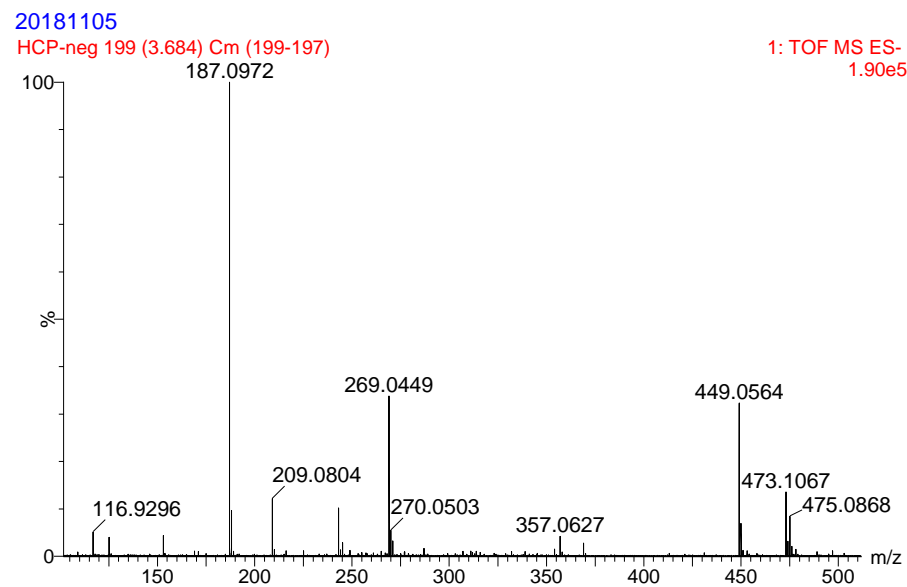

**Figure S9.** Mass spectrogram of chrysoeriol-7-O-glucuronide at 3.66 min negative ionization mode at low energy channels.

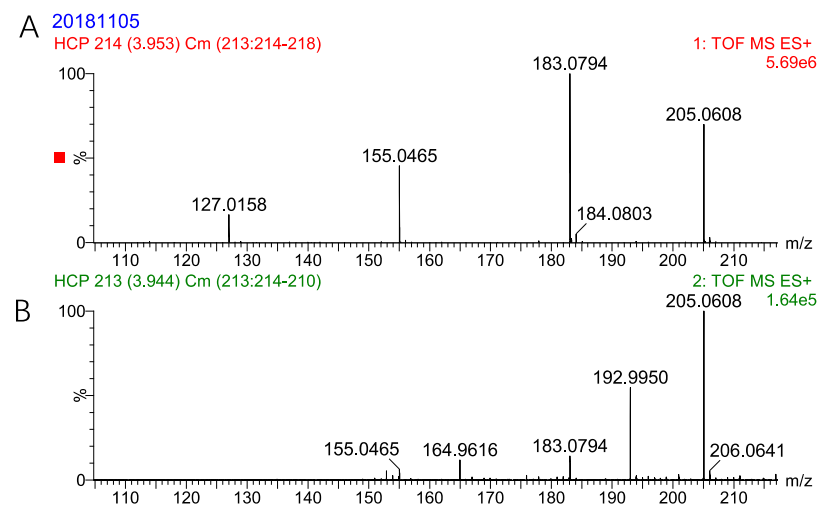

**Figure S10.** Mass spectrogram of 6-hydroxy-1,3-divinyldihydropyrimidine-2,4,5(3H)-trione at 3.95min (A) positive ionization mode at low energy channels; (B) positive ionization mode at high energy channels.

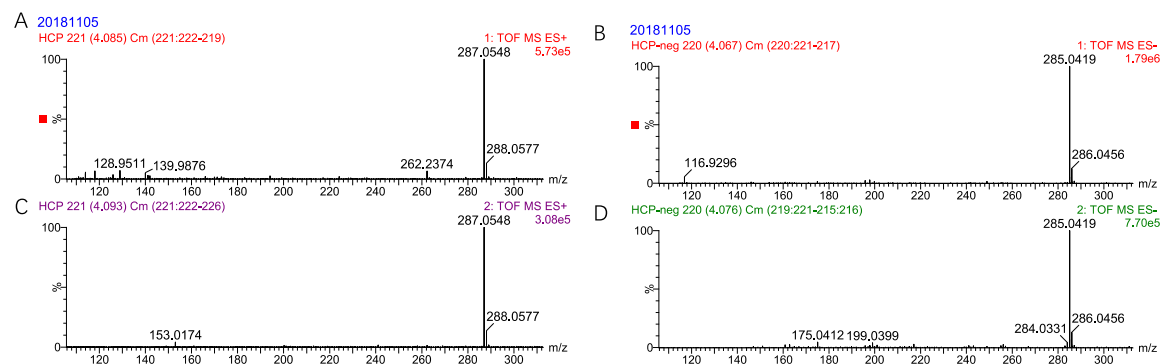

**Figure S11.** Mass spectrogram of luteolin at 4.07min (A) positive ionization mode at low energy channels; (B) negative ionization mode at low energy channels; (C) positive ionization mode at high energy channels; (D) negative ionization mode at high energy channels.

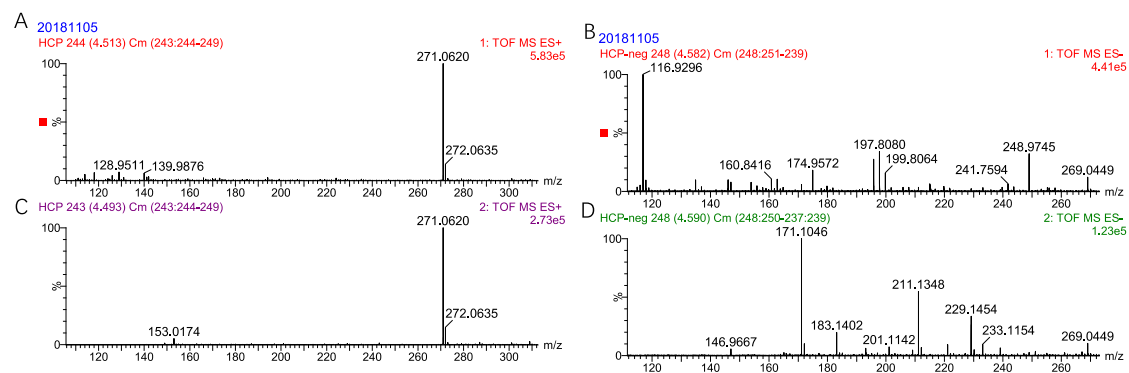

**Figure S12.** Mass spectrogram of apigenin at 4.48min (A) positive ionization mode at low energy channels; (B) negative ionization mode at low energy channels; (C) positive ionization mode at high energy channels; (D) negative ionization mode at high energy channels.

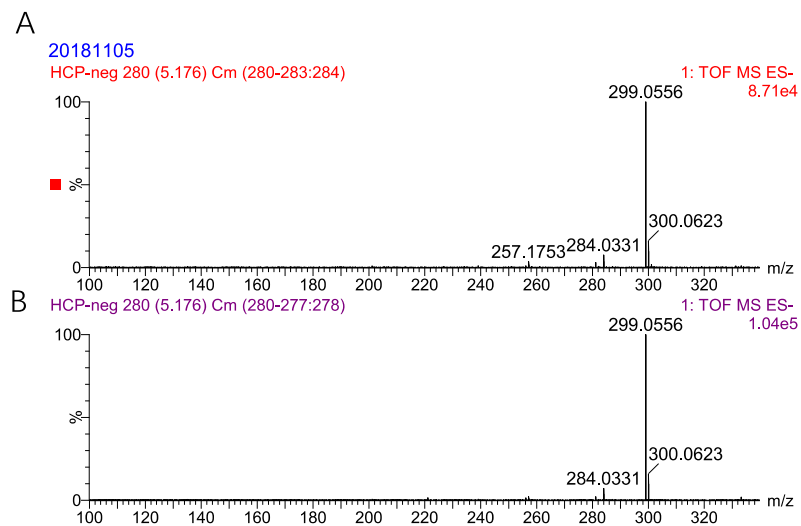

**Figure S13.** Mass spectrogram of chrysoeriol at 5.18 min (A) negative ionization mode at low energy channels; (B) negative ionization mode at high energy channels.

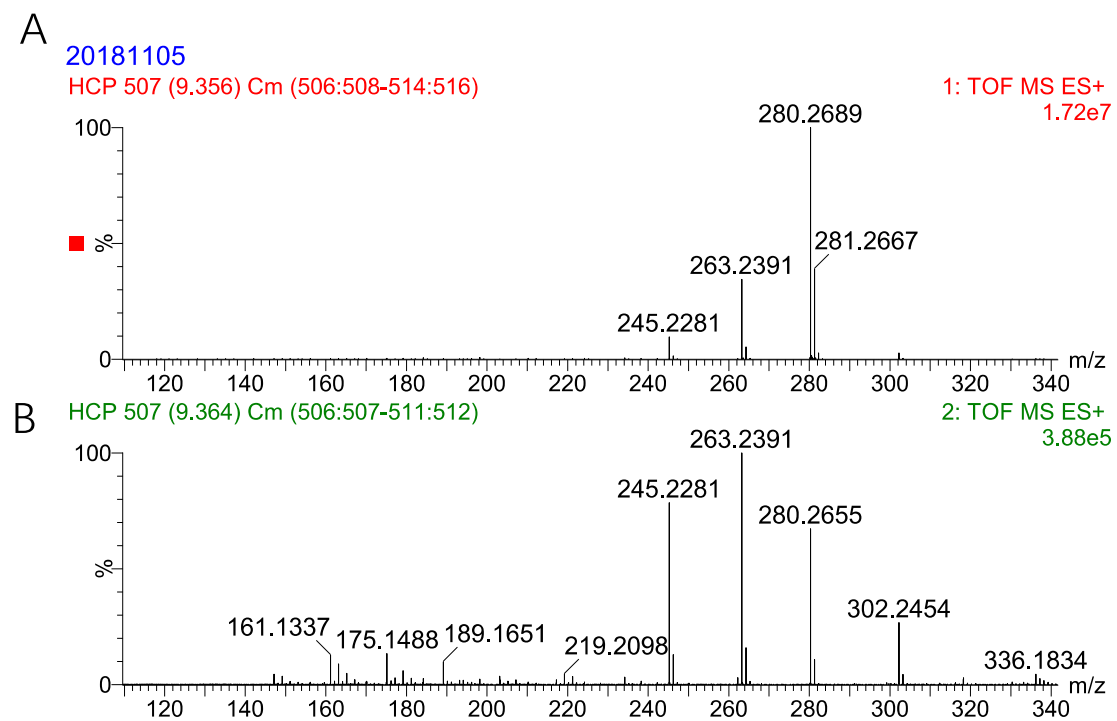

**Figure S14.** Mass spectrogram of (9E,12Z)-octadeca-9,12-dienamide at 9.36 min (**A**) positive ionization mode at low energy channels; (**B**) positive ionization mode at low energy channels.



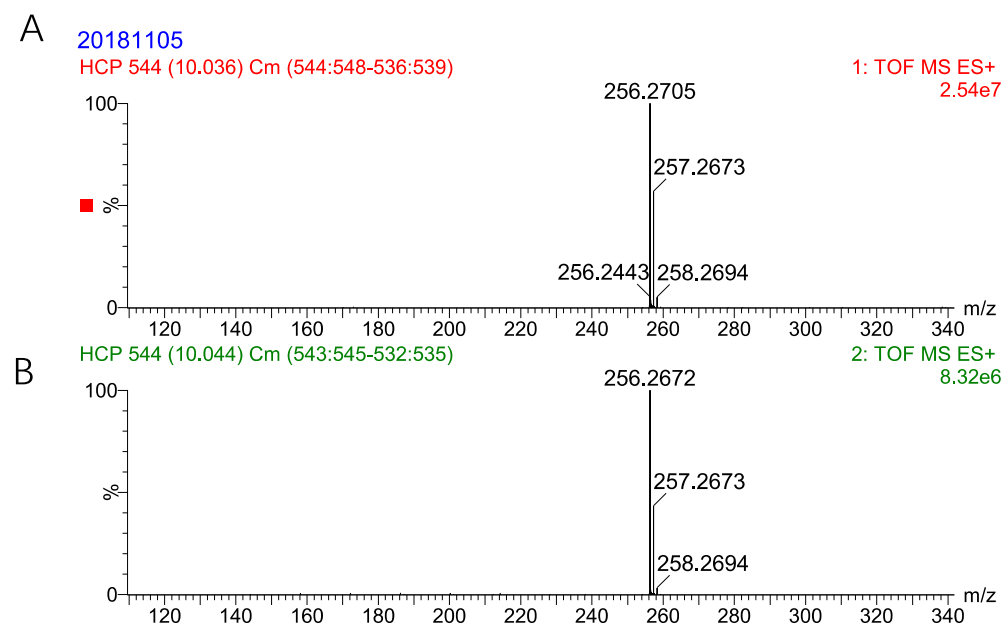

**Figure S15.** Mass spectrogram of palmitamide at 10.04 min **(A)** positive ionization mode at low energy channels; **(B)** positive ionization mode at low energy channels.
